1 **Capsular polysaccharide switching in *Streptococcus suis* modulates host cell**  
2 **interactions and virulence**

3  
4 Masatoshi Okura<sup>1#\*</sup>, Jean-Philippe Auger<sup>2#</sup>, Tomoyuki Shibahara<sup>3,4#</sup>, Guillaume Goyette-  
5 Desjardins<sup>2</sup>, Marie-Rose Van Calsteren<sup>5</sup>, Fumito Maruyama<sup>6,7</sup>, Mikihiro Kawai<sup>8</sup>, Makoto  
6 Osaki<sup>1</sup>, Mariela Segura<sup>2\*</sup>, Marcelo Gottschalk<sup>2\*</sup>, Daisuke Takamatsu<sup>1,9\*</sup>

7  
8 <sup>1</sup>Division of Bacterial and Parasitic Diseases, National Institute of Animal Health, National  
9 Agriculture and Food Research Organization, Tsukuba, Ibaraki, Japan

10 <sup>2</sup>Faculty of Veterinary Medicine, University of Montreal, Saint-Hyacinthe, Quebec, Canada

11 <sup>3</sup>Division of Pathology and Pathophysiology, National Institute of Animal Health, National  
12 Agriculture and Food Research Organization, Tsukuba, Ibaraki, Japan

13 <sup>4</sup>Department of Veterinary Science, Graduate School of Life and Environmental Sciences, Osaka  
14 Prefecture University, Izumisano, Osaka, Japan

15 <sup>5</sup>Saint-Hyacinthe Research and Development Centre, Agriculture and Agri-Food Canada, Saint-  
16 Hyacinthe, Quebec, Canada

17 <sup>6</sup>Microbial Genomics and Ecology, Office of Industry-Academia-Government and Community  
18 Collaboration, Hiroshima University, Hiroshima, Japan

19 <sup>7</sup>Scientific and Technological Bioresource Nucleus, Universidad de La Frontera, Temuco, Chile

20 <sup>8</sup>Graduate School of Human and Environmental Studies, Kyoto University, Kyoto, Japan

21 <sup>9</sup>The United Graduate School of Veterinary Sciences, Gifu University, Gifu, Gifu, Japan

22  
23 <sup>#</sup>These authors contributed equally to this work

24 <sup>\*</sup>Co-corresponding authors: E-mail: mokura@affrc.go.jp (M. Okura); p1013dt@affrc.go.jp (D.  
25 Takamatsu); marcelo.gottschalk@umontreal.ca (M. Gottschalk); mariela.segura@umontreal.ca (M.  
26 Segura)

27 Short title: Impact of serotype switching on *S. suis* virulence

28 **Abstract (249/250 words)**

29 *Streptococcus suis* serotype 2 strains can cause severe infections in both swine and  
30 humans. The capsular polysaccharide (CPS) of *S. suis* defines various serotypes based on its  
31 composition and structure. Though serotype switching from serotype 2 has been suggested to  
32 occur between *S. suis* strains, its impact on pathogenicity and virulence remains unknown.  
33 Herein, we experimentally generated *S. suis* serotype-switched mutants from a serotype 2 strain  
34 (SS2) that express the serotype 3, 4, 7, 8, 9, or 14 CPS (SS2to3, SS2to4, SS2to7, SS2to8, SS2to9,  
35 and SS2to14, respectively). The effects of serotype switching were then investigated with  
36 regards to classical properties conferred by presence of the serotype 2 CPS, including adhesion  
37 to/invasion of porcine tracheal epithelial cells, resistance to phagocytosis by murine  
38 macrophages, killing by murine and porcine whole blood, and dendritic cell-derived pro-  
39 inflammatory mediator production. Results demonstrated that these properties on host cell  
40 interactions were differentially modulated depending on the switched serotypes. Using a mouse  
41 model of systemic infection, SS2to8 was demonstrated to be hyper-virulent, with animals  
42 rapidly succumbing to septic shock, whereas SS2to3 and SS2to4 were less virulent than SS2  
43 because of a reduced systemic inflammatory host response. By contrast, switching to serotype  
44 7, 9, or 14 CPSs had little to no effect. Finally, development of clinical signs in a porcine model  
45 of infection was only observed following infection with SS2, SS2to7, and SS2to8. Taken  
46 together, these findings suggest that serotype switching can differentially modulate *S. suis* host  
47 cell interactions and virulence depending on the CPS type expressed.

48 **Importance (149/150 words)**

49 *Streptococcus suis* serotype 2 is the most frequently type associated with swine and  
50 zoonotic infections. While the serotype 2 CPS is required for virulence and pathogenesis, little  
51 information is available regarding that of other serotypes and how differences in serotype can  
52 directly affect host cell interactions and virulence. Herein, we constructed serotype-switched  
53 mutants from a serotype 2 strain and demonstrated that serotype switching can shift and  
54 modulate the *S. suis* host cell interactions and virulence *in vivo*. Among the serotype-switched  
55 mutants, the mutant expressing the serotype 8 CPS, whose composition and structure are  
56 identical to that of the human pathogen *Streptococcus pneumoniae* serotype 19F, was hyper-  
57 virulent, whereas mutants expressing the serotype 3 or 4 CPSs had reduced virulence. These  
58 results demonstrate that serotype switching can drastically alter *S. suis* phenotype.  
59 Consequently, further importance and attention should be given to the phenomenon of serotype  
60 switching and the possible emergence of hyper-virulent isolates.

## 61 Introduction

62 *Streptococcus suis* is an important porcine pathogen and zoonotic agent causing  
63 septicemia, meningitis and many other diseases [1-4]. This bacterium has evolutionarily  
64 adapted to pigs, with nearly 100% of carriage rate in the upper respiratory tract [4, 5]. *S. suis*  
65 strains are serotyped based on structural differences in the capsular polysaccharide (CPS) [2,  
66 4]. Among thirty-five reported serotypes (serotypes 1-34 and 1/2), serotype 2 is responsible for  
67 the majority of human clinical cases and is the most frequently isolated from diseased pigs [2].  
68 Serotypes 1/2, 3, 4, 7, 8, 9, and 14 are also frequently isolated from diseased pigs, although  
69 their distributions differ depending on the geographic location [2]. Multilocus sequence typing  
70 (MLST) for *S. suis* has demonstrated genetic diversity within this species, with more than 1,000  
71 sequence types, and several clonal complexes (CCs) potentially associated with diseases in  
72 humans and pigs [2, 6]. Accumulated serotyping and MLST data indicate the presence of  
73 different CCs in the population of serotype 2 strains, and several different serotypes in the  
74 respective CCs [pubMLST: <http://pubmlst.org/ssuis/>]. Taken together, this suggests that  
75 serotype switching may occur between *S. suis* serotype 2 and different serotype isolates.

76  
77 The *S. suis* CPS is produced by the repetition of a defined oligosaccharide unit formed  
78 by a unique arrangement of various sugars [7]. Indeed, unique CPS structures of serotypes 1, 2,  
79 3, 7, 8, 9, 14, 18, and 1/2 have been previously determined [8-13] (**Fig. S1**). Furthermore,  
80 previous studies have shown that more than 10 genes related to *S. suis* CPS synthesis are  
81 clustered on a genomic locus [7, 14]. Alongside, the CPS synthesis gene (*cps* gene) clusters of  
82 serotypes 1 and 14 and serotypes 2 and 1/2 are almost identical [7], with their CPS structure  
83 differing by the substitution of only a galactose (Gal) for a *N*-acetylgalactosamine (GalNAc)  
84 [10] due to a single nucleotide polymorphism in the glycosyltransferase *cpsK* gene [15]. Except  
85 for these four serotypes, gene repertoires in the *cps* gene clusters greatly differ between  
86 serotypes [7, 14], indicating that up-take of genomic DNA of different serotypes and  
87 replacement of *cps* gene cluster by homologous recombination, using flanking sequences of the  
88 clusters, is usually required for serotype switching. In *S. suis*, some strains are naturally  
89 transformable, with the competent state induced by competence gene products [16, 17].  
90 Although serotype switching in *S. suis* has not yet been demonstrated, these findings suggest  
91 that replacement of the *cps* gene clusters may occur in strains in the competent state through  
92 up-take of genomic DNA of the other serotype strains from the environment.

93

94           Importantly, the serotype 2 CPS has been shown to play critical roles in protection  
95 against phagocytosis by innate immune cells and masking of bacterial surface proteins involved  
96 in host cell activation [18]. In addition, several studies have demonstrated non-virulence of the  
97 isogenic non-encapsulated serotype 2 mutants in murine and porcine models of infection [18].  
98 However, very little information is available regarding the CPS of other *S. suis* serotypes and  
99 is restricted to two studies on serotypes 9 and 14 [18, 19]. Furthermore, comparing the virulence  
100 of strains from different serotypes is impossible due to the high genotypic variation between  
101 strains. Accordingly, it remains unclear whether *S. suis* serotype switching (i.e., differences in  
102 CPS structure) can affect host cell interactions and strain virulence, even though serotype  
103 switching may occur among *S. suis* strains.

104  
105           In the present study, serotype-switched *S. suis* mutants were experimentally  
106 generated to investigate the impacts of CPS type on the host cell interactions and virulence *in*  
107 *vivo*. The mutants were switched from serotype 2, which is the most important in this species,  
108 to serotypes 3, 4, 7, 8, 9, and 14, which are frequently isolated from diseased pigs and found in  
109 several CCs with serotype 2 human isolates (CC1, CC20, CC25, CC28, and CC104). Generated  
110 mutants have allowed us to study the modulation of the pathogenesis of *S. suis* caused by  
111 serotype switching.

## 112 113 **Results**

### 114 **Generated serotype-switched *S. suis* mutants contain few mutations other than the *cps*** 115 **locus.**

116           Six different serotype-switched mutants (SS2to3, SS2to4, SS2to7, SS2to8, SS2to9,  
117 and SS2to14) and non-encapsulated mutant  $\Delta$ CPS2, from which the *cps* locus was deleted, were  
118 generated from the serotype 2 strain P1/7 (hereafter SS2) (**Table 1**, generated as illustrated in  
119 **Fig. S2** and **Fig. S3**). Serotype-switched mutants were confirmed to belong to the correct  
120 serotype using classical serological techniques [23].

121  
122           Serotype switching had little effect on bacterial growth *in vitro* (**Fig. S4**). Well-  
123 encapsulation of the serotype-switched mutants were confirmed by surface hydrophobicity and  
124 transmission electron microscopy (TEM) (**Fig. 1A and B**). Moreover, purified CPS yields of  
125 the mutants SS2to3, SS2to7, SS2to8, SS2to9, and SS2to14 were comparable to those previously  
126 reported [9, 11-13] (**Table S1**). Nuclear magnetic resonance (NMR) analyses confirmed the

127 serotype identity for the serotype-switched mutants, except for SS2to9 (**Fig. S5**) [9, 11-13]. The  
128 CPS of SS2to9 slightly differed from that of serotype 9 strain 1273590 (used for CPS structure  
129 determination [11]) in that SS2to9 possessed a glucose instead of a galactose side chain (**Fig.**  
130 **S6A**), suggesting that the donor strain and SS2to9 may be classified as a serotype 9 variant,  
131 which reacts with anti-serotype 9 serum (see **Text S1** for more detail). Taken together, these  
132 results confirm that the constructed serotype-switched mutants functionally possess and express  
133 the CPS of the donor serotype.

134  
135 To investigate potential mutations in the genomes of the serotype-switched mutants  
136 occurred following the transformation of whole genomic DNA, draft genome sequences of the  
137 mutants were compared with those of SS2 and the donors. The mutants had mutations in several  
138 genes besides the *cps* genes, which differed between mutants (**Fig. 2**, **Fig. S7**, and **Table S2**;  
139 see **Text S2** for more detail). However, no genes other than *cps* genes were gained in the  
140 genomes of the different mutants. Although it remains unclear whether these mutations might  
141 affect host-pathogen interactions and virulence, nonsense and frameshift mutations in genes,  
142 including virulence-associated genes [18], did not occur (**Table S2**). This means that the  
143 mutants constructed in this study have almost identical genetic background to SS2 compared  
144 to the heterogenous genetic background of the different serotype strains, enabling more strict  
145 evaluation of the CPS effect hereafter.

146

#### 147 **Switching from serotype 2 of *S. suis* can modulate host cell interactions.**

148 The serotype 2 CPS has been described to mask surface adhesins involved in the  
149 initial interactions with host cells, including adhesion to and invasion of epithelial cells [19,  
150 25], to resist phagocytosis by macrophages and bactericidal killing by blood leukocytes to  
151 persist in the bloodstream and cause systemic dissemination [18], and to mask subcapsular  
152 immunostimulatory components to interfere pro-inflammatory mediator production by  
153 dendritic cells (DCs) [26, 27].

154

155 First, using newborn pig trachea (NPTr) cells, the adhesion and invasion capacities  
156 were evaluated between SS2 and the mutants. While SS2, SS2to3, SS2to4, SS2to9, and  
157 SS2to14 similarly adhered to NPTr cells at 2 h, adhesion of SS2to7 and SS2to8 was  
158 significantly greater ( $P < 0.05$ ), similar to that of  $\Delta$ CPS2 used as a positive control (**Fig. 3A**).  
159 Unlike adhesion results, invasion of the different mutants was similar to that of SS2, with little

160 invasion of NPTr cells overall, although  $\Delta$ CPS2 showed high levels of invasion, as expected  
161 (**Fig. 3B**).

162

163 Next, macrophage phagocytosis resistance was evaluated using the J774A.1 murine  
164 macrophage cell line. As expected, SS2 and  $\Delta$ CPS2 were poorly and highly internalized by  
165 macrophages, respectively (**Fig. 3C**). No differences were observed in the internalization  
166 between SS2 and the serotype-switched mutants after 1 h incubation (data not shown); however,  
167 switching to serotype 4, 7 or 8 significantly increased phagocytosis, after 2 h incubation ( $P <$   
168  $0.05$ ) (**Fig. 3C**). However, it should be noted that this increase was of approximately one log-  
169 fold, which is, though significant, relatively minor compared to the non-encapsulated mutant  
170 (4 log-fold increase).

171

172 The capacity to resist the bactericidal effect of leukocytes was then evaluated using  
173 murine and porcine whole blood. SS2 was completely resistant to killing by murine blood in  
174 contrast to  $\Delta$ CPS2, which was efficiently killed (60% of killing) (**Fig. 3D**). While SS2to7,  
175 SS2to8, SS2to9, and SS2to14 were also resistant to killing by murine whole blood, SS2to3 and  
176 SS2to4 were significantly more killed, with 20% and 30% of killing, respectively ( $P < 0.05$ )  
177 (**Fig. 3D**). Using a porcine blood system, SS2 was not only able to persist, but also to some  
178 extent multiply, whereas  $\Delta$ CPS2 was markedly cleared ( $P < 0.05$ ) (**Fig. 3E**). Comparable to  
179 SS2, SS2to8 could significantly multiply, whereas all other mutants were cleared at different  
180 degrees (**Fig. 3E**). As with mouse blood, SS2to3 and SS2to4 showed the greatest impairment  
181 in their capacity to survive in porcine blood (**Fig. 3E**). It should be noted, however, that levels  
182 of cross-reactive antibodies against the different strains might affect the results observed with  
183 the swine blood and thus can be considered a confounding factor, although this fact also mimics  
184 the real situation in the field.

185

186 Lastly, the interactions with DCs were evaluated. Absence of CPS significantly  
187 increased production of all mediators tested ( $P < 0.05$ ), with the exception of CCL2 (**Fig. 3F**),  
188 as previously reported [19, 25]. SS2to3, SS2to7, SS2to9, or SS2to14, along with SS2, did not  
189 modulate pro-inflammatory mediator production (**Fig. 3F**). However, stimulation with SS2to8  
190 significantly increased production of TNF, IL-6, IL-12p70, CCL5, CXCL1, and CXCL9,  
191 compared to SS2 ( $P < 0.05$ ) (**Fig. 3F**). By contrast, SS2to4 induced significantly lower levels

192 of TNF, IL-6, IL-12p70, and CXCL9 than SS2 ( $P < 0.05$ ), but CCL5 or CXCL1. CCL2  
193 production was not modulated regardless of the CPS type (**Fig. 3F**).

194

### 195 **Serotype switching can differentially modulate *S. suis* virulence in a mouse model of** 196 **systemic infection**

197 The impact of switching from serotype 2 on *S. suis* virulence was evaluated using a  
198 well-established C57BL/6 mouse infection model for *S. suis* serotype 2 virulence studies [28].  
199 Following intraperitoneal inoculation of SS2, 60% of mice died after developing clinical signs  
200 of systemic infection (**Fig. 4A**). By contrast, none of the  $\Delta$ CPS2-inoculated mice died,  
201 presenting no or very mild clinical signs the first 24 h only (**Fig. 4A**). No significant differences  
202 in mortality were observed between SS2 and SS2to3, SS2to7, SS2to9, or SS2to14 (**Fig. 4A**).  
203 However, clinical signs of infection caused by SS2to3 were generally less severe than those by  
204 SS2. Unexpectedly, inoculation of SS2to8 significantly increased mouse mortality, with  
205 100% of mice succumbing to septic shock within 24 h post-infection ( $P < 0.05$ ) (**Fig. 4A**). By  
206 contrast, none of the SS2to4-infected mice died, presenting transient clinical signs within the  
207 first 48 h ( $P < 0.05$ ) (**Fig. 4A**).

208

209 Blood bacterial burdens of infected mice were also determined to investigate the  
210 effect on persistent bacteremia. Twenty-four hours post-infection, bacterial burdens of SS2-  
211 infected mice averaged  $3 \times 10^7$  colony-forming unit (CFU)/mL, whereas those in mice infected  
212 with  $\Delta$ CPS2 were not detectable ( $< 1 \times 10^2$  CFU/mL) (**Fig. 4B**). Similar to mortality, no  
213 significant difference was observed between SS2 and SS2to3, SS2to7, SS2to9 or SS2to14 (**Fig.**  
214 **4B and Fig. S8**). Meanwhile, blood bacterial burden of SS2to8-infected mice was significantly  
215 greater than that of SS2-infected mice ( $P < 0.05$ ), averaging  $2 \times 10^9$  CFU/mL (**Fig. 4B**). By  
216 contrast, blood bacterial burden was significantly reduced in SS2to4-infected mice compared  
217 to SS2 ( $P < 0.05$ ), although blood burden remained detectable until at least 72 h post-infection,  
218 which differs from  $\Delta$ CPS2-infected mice (**Fig. 4B and Fig. S8**).

219

220 Furthermore, plasmatic levels of different pro-inflammatory mediators (12 h post-  
221 infection) were evaluated to investigate exacerbated systemic inflammation. The levels were  
222 elevated in SS2-infected mice, whereas they were undetectable in  $\Delta$ CPS2-infected mice (**Fig.**  
223 **4C**). Globally, no differences were observed in systemic inflammation between SS2-infected  
224 mice and those infected with SS2to7, SS2to9, or SS2to14 (**Fig. 4C**). However, a significant



225 increase in the production of all the inflammatory mediators was observed in SS2to8-infected  
226 mice ( $P < 0.05$ ), in accordance with the results on mortality observed above (**Fig. 4A**).  
227 Meanwhile, plasmatic levels of all mediators were significantly decreased in SS2to4-infected  
228 mice compared to SS2 ( $P < 0.05$ ), although levels were detectable (**Fig. 4C**). Notably, infection  
229 with SS2to3 resulted in a significant reduction of most pro-inflammatory mediators compared  
230 to SS2, though reduction was not as great as with SS2to4 (**Fig. 4C**).

231

### 232 **Serotype switching can differentially modulate *S. suis* virulence in piglets**

233 Impact of serotype switching on *S. suis* virulence was subsequently evaluated in the  
234 natural host of this bacterium by an experimental intranasal infection model, representing the  
235 natural route of exposure to *S. suis*. The mutants were divided into two experiments (experiment  
236 I: SS2,  $\Delta$ CPS2, SS2to4, or SS2to7; experiment II: SS2, SS2to3, SS2to8, or SS2to14) (**Table 2**).  
237 Virulence of the SS2to9 was not evaluated for ethical reasons, since no differences were  
238 observed in host cell interactions assays *in vitro* nor in the mouse infection model. In  
239 experiment I, none of the  $\Delta$ CPS2-infected pigs developed any clinical signs of infection, while  
240 all SS2-infected pigs showed clinical signs of systemic and/or central nervous system infection,  
241 including lame and shivering (**Table S3**). In fact, three out of four SS2-infected pigs were  
242 euthanized at 3 or 4 days post-infection (dpi) due to severity of clinical signs (**Table 2** and  
243 **Table S3**). The inoculated strain was recovered from the blood and several organs, including  
244 the joints and brain, in all SS2-infected pigs (**Table 3** and **Table S4**). Recovery of SS2 from  
245 the joints and brain was also confirmed in the animals presenting lameness or shivering (**Table**  
246 **3** and **Table S4**). Meanwhile, recovery of the inoculum was not observed from any of the  
247 investigated sites in the  $\Delta$ CPS2-infected pigs, except for the tonsils (two pigs) and the liver (one  
248 pig) (**Table 3** and **Table S4**). All SS2to4- and three of SS2to7-infected pigs presented no  
249 clinical signs of infection (**Table 2** and **Table S3**), which were, except for the tonsils and a  
250 single organ, negative for bacterial recovery (**Table 3** and **Table S4**). However, one of the  
251 SS2to7-infected pigs developed shivering, and bacteria were only recovered from the brain and  
252 tonsils (**Table S4**).

253

254 Unfortunately, none of the SS2-infected pigs developed clinical signs in experiment  
255 II, with recovery only from the tonsils and joints (**Table 3** and **Table S4**), although slight fever  
256 was observed 4 dpi (**Table 2** and **Table S3**). These difference in results of SS2 between  
257 experiments may be due to the pigs being used originated from different suppliers. Although

258 most SS2to3-, SS2to8-, or SS2to14-infected pigs showed no clinical signs, one of the SS2to8-  
259 infected pigs developed clinical symptoms, including inactivity and clear incoordination (**Table**  
260 **2** and **Table S3**). Nevertheless, SS2to14 was recovered from the blood and organs of one of the  
261 infected pigs. Excluding this individual, however, bacterial recovery was mostly negative for  
262 SS2to3- or SS2to14-infected pigs. Meanwhile, bacteria were recovered from multiple organs  
263 in all the SS2to8-infected pigs, though recovery from blood was recorded in only the individual  
264 presenting clinical symptoms (**Table 3** and **Table S4**).

265

## 266 **Discussion**

267 This study provides the first evidence that serotype switch in *S. suis* can definitively  
268 modify the interactions with host cells and *in vivo* (Summarized in Table 4). CPS expression of  
269 *S. suis* serotypes 2, 9, and 14 plays critical roles on colonization and anti-phagocytic activity,  
270 important steps of the pathogenesis [18, 19, 29]. In this study, under almost the same genetic  
271 background of the serotype 2 strain P1/7 (SS2), only switching to serotype 7 or 8 changed the  
272 adhesion pattern of SS2 to porcine tracheal epithelial cells. Regarding anti-phagocytic activity,  
273 no significant or minor difference was observed by serotype switching. By further evaluation  
274 on the effects on serotype-switching using *ex vivo* (blood) and *in vivo* infection models (mouse  
275 and pig), only mutants switched to serotype 4 or 8 showed a marked and consistent impact on  
276 several bacterial virulence traits. The CPS4 conferred to *S. suis* a non-virulent phenotype  
277 characterized by increased susceptibility to killing by mouse and pig blood, reduced bacteremia  
278 in mice, diminished cytokine production (*in vitro* and *in vivo*), and low bacterial recovery from  
279 internal organs in pigs. In marked contrast, the CPS8 conferred to *S. suis* an hyper-virulent  
280 phenotype characterized by high capacity to multiply in pig blood, high bacteremia (mice) and  
281 organ dissemination (pigs), and increased capacity to induce a cytokine storm (*in vitro* and *in*  
282 *vivo* in the mouse model). It should be noted that switching to serotype 14 or 9 (variant) had no  
283 major effects on *S. suis* virulence or its interactions with the host either *in vitro* or *in vivo* in the  
284 mouse model. Meanwhile, serotype switch to CPS7 or CPS3 has restricted impact and affected  
285 few of the evaluated parameters. The SS2to7 mutant has slightly increased susceptibility to  
286 killing by pig blood and reduced virulence in the swine infection model, being mainly recovered  
287 from tonsils. The SS2to3 mutant presented increased susceptibility to killing by mouse and pig  
288 blood, slightly reduced bacteremia in mice, and diminished capacity to induce cytokine  
289 production *in vivo*. Though serotype 3 CPS expression still caused *S. suis*-induced host death,  
290 clinical signs were less severe than those caused by SS2 in the mouse model. None of the pigs

291 infected with SS2 developed clinical signs in experiment II, so a reduced virulence of SS2to3  
292 mutant could not be definitively confirmed in the natural host. Overall, results obtained with  
293 the different mutants confirmed the delicate balance between bacterial burden, systemic  
294 dissemination, level of the inflammatory response, and clinical outcome [28, 30, 31]. Given  
295 that only different CPSs were expressed between mutants, these differences in effects  
296 depending on switched serotypes might be due to differential cell wall component exposure,  
297 including adhesins and immunostimulatory components, and/or recognition of certain motifs  
298 of specific *S. suis* CPSs by unknown host cell receptors.

299

300 This work also highlighted the complexity of *S. suis* host-pathogen interactions and  
301 the carefulness required when analyzing data from single cell type cultures vs. more complex  
302 biological systems (such as blood). For instance, neutrophils and monocytes are the main  
303 phagocytes in blood, with little to no macrophages being present. Therefore, results obtained  
304 with macrophages might not necessary reflect *S. suis* fitness in blood, but rather mimic the  
305 situation in tissues. Similarly, the interactions of *S. suis* with swine blood leukocytes are more  
306 complex than those evaluated when using mouse blood due to the presence of swine antibodies  
307 reacting against the bacteria. Thus, by using multiple *in vitro* and *in vivo* models, a more  
308 comprehensive analysis is obtained.

309 In *Streptococcus pneumoniae*, strict evaluations of the CPS effects using CPS switch  
310 mutants have already been performed, and several studies demonstrated that capsule type  
311 affected resistance to both complement C3b deposition and opsonophagocytic uptake [32],  
312 nonopsonic neutrophil-mediated killing [33], and adhesion to the pharyngeal or lung epithelial  
313 cells [34]. Some of these studies also indicated the effect on virulence within the respiratory  
314 tract [34], colonization [33], survival in blood [32], and brain injury [33] by *in vivo* infection  
315 models. The structure and composition of CPS8 of *S. suis* is known to be identical to that of *S.*  
316 *pneumoniae* serotype 19F [13], with serotype 19F pneumococcus mutant being shown to be the  
317 most resistant to non-opsonic killing by human neutrophils among the mutants [33], suggesting  
318 that this structure of CPS provides the bacteria with high resistance to killing in blood. Previous  
319 studies using serotype-switched mutants [33, 36] also showed that CPS type affects the degree  
320 of encapsulation and growth phenotype due to the difference in metabolic costs for producing  
321 capsule between CPS types. These points should be evaluated in *S. suis* in the future.

322

323 In conclusion, these data demonstrate that serotype switching in *S. suis* serotype 2  
324 can modulate host cell interactions and virulence. Among the tested serotypes, switch to  
325 serotype 8 increased the virulence. Although it remains unknown whether *S. suis* serotype  
326 switching affects virulence in humans, one serotype 8 strain having a genetic background  
327 similar to virulent serotype 2 clinical isolates has already been recovered (unknown source:  
328 pubMLST: <http://pubmlst.org/ssuis/>). Therefore, these results clearly demonstrate that more  
329 attention should be given to serotype switching in *S. suis* with regards to both commensal and  
330 pathogenic strains.

331

332

## 333 **Materials and methods**

### 334 **Ethics statement**

335 The animal experiments in this study were approved by the institutional committees  
336 for Ethics of Animal Experiments of the National Institute of Animal Health Japan (approval  
337 numbers 17-002, 17-010, and 17-085) and by the Animal Welfare Committee of the University  
338 of Montreal (approval number Rech-1570). Both committees formulated the guidelines and  
339 policies required to meet and adhere to the standards in the Guide for the Care and Use of  
340 Laboratory Animals.

341

### 342 ***S. suis* culturing**

343 The *S. suis* strains used in this study are listed in **Table 1**. The serotype 2 strain P1/7  
344 (SS2 in this study) [20] was used as the parental strain for construction of the serotype-switched  
345 mutants. P1/7 belongs to CC1 and was shown to be induced to a competent state using XIP  
346 [17]. *S. suis* strains of serotypes 3, 4, 7, 8, 9, and 14 were used as donors to construct the  
347 serotype-switched mutants. All strains were cultured overnight on Todd-Hewitt (TH) agar  
348 (Becton Dickinson, Franklin Lakes, NJ, USA) at 37°C with 5% CO<sub>2</sub> unless indicated otherwise.  
349 Chloramphenicol was added to the medium at 5 µg/mL, when needed.

350

### 351 **General molecular biology techniques**

352 All PCRs were completed using the iProof HF Master Mix (BioRad Laboratories,  
353 Hercules, CA, USA) and QIAGEN Multiplex Master PCR Mix (Qiagen, Hilden, Germany)  
354 according to the manufacturers' instructions. The PCR primers used in this study are listed in  
355 **Table S5**. The amplified PCR products were purified using the QIAQuick PCR Purification

356 Kit (Qiagen) and sequenced on a 3130xl Genetic Analyzer (Applied Biosystems, Foster City,  
357 CA, USA) using a BigDye Terminator v3.1 Cycle Sequencing Kit (Applied Biosystems) where  
358 required. The sequence assembly of the PCR products was performed using SEQUENCHER  
359 5.4 (Gene Codes Corp., Ann Arbor, MI, USA).

360

### 361 **Construction of serotype-switched mutants and non-encapsulated mutant**

362 An outline of the approach developed for the construction of the serotype-switched  
363 mutants is represented in **Fig. S1**. First, a non-encapsulated mutant whose *cps* locus was  
364 replaced with a chloramphenicol resistance gene ( $\Delta$ CPS2 $_{\text{tocat}}$ ) was generated from SS2. Then,  
365 the  $\Delta$ CPS2 $_{\text{tocat}}$  was transformed with whole genome of donor strains to yield the desired  
366 serotype-switched mutants through the replacement of the *cat* with the donor *cps* locus (See  
367 **Text S3** for more detail). For generation of the markerless non-encapsulated mutant, blue-white  
368 screening method using 5-bromo-4-chloro-3-indoxyl- $\alpha$ -L-fucopyranoside (X- $\alpha$ -L-  
369 fucopyranoside) was performed as represented in **Fig. S2** (See **Text S4** for more detail).

370

### 371 ***S. suis* growth measurements**

372 Strains were streaked onto TH agar plates and incubated overnight at 37°C with 5%  
373 CO<sub>2</sub> and then subcultured in TH broth to an optical density 600 nm (OD<sub>600</sub>) of 0.6 using a  
374 spectrophotometer Ultrospec 2100 (Biochrom Ltd., Cambridge, UK). After adding 1/500 of the  
375 volume of each adjusted culture diluted 1,000 times by TH broth to TH broth, the cultures were  
376 incubated at 37°C under air plus 5% CO<sub>2</sub> conditions. The CFU(/mL) of each of the cultures was  
377 measured at 2, 4, 6, 8, 10, 12, and 14 h after incubation by plating serial dilutions on TH agar.

378

### 379 **Confirmation of serotype switching**

380 Serotyping, cell surface hydrophobicity test, TEM, measurement of CPS yields,  
381 NMR spectroscopy were performed to confirm well-encapsulation and serotype switching as  
382 previously described [27, 37, serotyping and TEM; 38, hydrophobicity tests; 9,11,12,13, CPS  
383 purification and NMR] (see **Text S5** for more detail).

384

### 385 **Whole genome sequence analyses**

386 Whole genome draft sequences were determined using Illumina HiSeq X ten  
387 sequencing platform at the Beijing Genomics Institute (Shenzhen, China) or Illumina NovaSeq  
388 platform at Novogene Corporation (San Diego, CA, USA) (See **Text S6** for more detail). The

389 final draft genome sequence of each of the mutants was then mapped and aligned with the  
390 publicly available complete genome sequence of strain P1/7 using Geneious Prime ver.  
391 2019.1.1 (Tomy Digital Biology, Tokyo, Japan) with the default parameters.

392

### 393 ***In vitro* assays for evaluation of impacts on serotype switching**

394 Adhesion and invasion assays using the porcine tracheal epithelial NPTr cell line,  
395 phagocytosis assays using J774A.1 murine macrophages, murine whole blood bactericidal  
396 assay using blood collected from 6- to 10-week-old C57BL/6J mice and from a five-week-old  
397 piglet, and measurement of pro-inflammatory mediator production by DCs generated using the  
398 femur and tibia of C57BL/6J mice were performed as previously described [19, 28, 39]. (see  
399 **Text S7** for more detail).

400

### 401 ***In vivo* assays for evaluation of impacts on serotype switching**

402 Mouse infections were performed using 10-12 six-week-old male and female  
403 C57BL/6J mice per group via intraperitoneal inoculation (dose of  $1 \times 10^7$  CFU/mouse) for  
404 survival and blood bacterial burden evaluation as previously described [28]. Plasma (systemic)  
405 pro-inflammatory mediators were measured using blood collected from eight mice  
406 intraperitoneally infected with  $1 \times 10^7$  CFU 12 h post-infection as previously described [28].  
407 Pig infections were performed for evaluation of appearance of symptoms and organ  
408 dissemination using 4-5 five-week-old crossbred male and female piglets per group purchased  
409 from Shokukanken Inc. (Gunma, Japan) or CIMCO Co. Ltd. (Tokyo, Japan). Infections were  
410 carried out via intranasal inoculation (dose of  $2 \times 10^9$  CFU) for survival as previously described  
411 [40] and divided into two experiments per four groups (Experiment I: SS2,  $\Delta$ CPS2, SS2to4,  
412 and SS2to7; experiment II: SS2, SS2to3, SS2to8, and SS2to14) (see **Text S8** for more detail).

### 413 **Statistical analyses**

414 Normality of data distribution was verified using the Shapiro-Wilk test and Mann-  
415 Whitney rank sum tests were performed to evaluate statistical differences between groups. Data  
416 are presented as mean  $\pm$  SEM or as geometric mean. Log-rank (Mantel-Cox) tests were used to  
417 compare survival between groups of mice.  $P < 0.05$  was considered statistically significant.

418

### 419 **Data availability**

420 All sequences determined in this study were deposited in the DDBJ/ENA/GenBank  
421 databases under the accession numbers (P1/7, WABV000000000;  $\Delta$ CPS2tocat,

422 WABW00000000; SS2to3, WABX00000000; SS2to4, WABY00000000; SS2to7,  
423 WABZ00000000; SS2to8, WACA00000000; SS2to9, JABMDA00000000; SS2to14,  
424 WACB00000000; MO690, WACC00000000; MO691, WACD00000000; MO941,  
425 WACE00000000).

426

## 427 **Acknowledgments**

428           This work was funded by the JSPS KAKENHI grants #18H02658 (MO and TS) and  
429 #26870840 (MO), as well as by the Natural Sciences and Engineering Research Council of  
430 Canada (NSERC) grants #04435 (MG) and #342150 (MS). JPA and GGD are recipients of an  
431 Alexander Graham Bell Graduate Scholarship – Doctoral Program from NSERC. MS is the  
432 holder of a Canada Research Chair – Tier 1. The funders had no role in study design, data  
433 collection and interpretation, or the decision to submit the work for publication.

434           The authors would like to thank Sonia Lacouture for technical help and advice,  
435 Mariane Grzebyk and Claudia Duquette for technical assistance with the production and  
436 purification of the CPSs, Kaori Tosaki, Kennosuke Sugie, Koujiro Yoshizaki, Yusuke Abeto,  
437 and Hirotaka Itoh for TEM analysis, and Han Zheng for providing information on genome  
438 sequence of serotype 9 strains. Computational resources were partly provided by the Data  
439 Integration and Analysis Facility, National Institute for Basic Biology, Japan.

## 440 References

- 441 1. Staats JJ, Feder I, Okwumabua O, Chengappa MM. 1997. *Streptococcus suis*: past and  
442 present. *Vet Res Commun* 21:381–407. doi: 10.1023/a:1005870317757.
- 443 2. Goyette-Desjardins G, Auger JP, Xu J, Segura M, Gottschalk M. 2014. *Streptococcus suis*,  
444 an important pig pathogen and emerging zoonotic agent—an update on the worldwide  
445 distribution based on serotyping and sequence typing. *Emerg Microbes Infect* 3:e45. doi:  
446 10.1038/emi.2014.45.
- 447 3. Gottschalk M, Xu J, Calzas C, Segura M. 2010. *Streptococcus suis*: a new emerging or an  
448 old neglected zoonotic pathogen? *Future Microbiol* 5:371–391. doi: 10.2217/fmb.10.2.
- 449 4. Gottschalk M and Segura M. 2019. Streptococcosis. p 934–950. In Zimmerman JJ,  
450 Karriker LA, Ramirez A, Schwartz KJ, Stevenson GW (ed), *Diseases of Swine*, 11th ed,  
451 Wiley-Blackwell, Ames, IA.
- 452 5. Vötsch D, Willenborg M, Weldearegay YB, Valentin-Weigand P. 2018. *Streptococcus*  
453 *suis* - The "Two Faces" of a Pathobiont in the Porcine Respiratory Tract. *Front Microbiol*  
454 9:480. doi: 10.3389/fmicb.2018.00480.
- 455 6. Okura M, Osaki M, Nomoto R, Arai S, Osawa R, Sekizaki T, Takamatsu D. 2016. Current  
456 taxonomical situation of *Streptococcus suis*. *Pathogens* 5:e45. doi:  
457 10.3390/pathogens5030045.
- 458 7. Okura M, Takamatsu D, Maruyama F, Nozawa T, Nakagawa I, Osaki M, Sekizaki T,  
459 Gottschalk M, Kumagai Y, Hamada S. 2013. Genetic analysis of capsular polysaccharide  
460 synthesis gene clusters from all serotypes of *Streptococcus suis*: potential mechanisms for  
461 generation of capsular variation. *Appl Environ Microbiol* 79:2796–2806. doi:  
462 10.1128/AEM.03742-12.
- 463 8. Van Calsteren MR, Gagnon F, Lacouture S, Fittipaldi N, Gottschalk M. Structure  
464 determination of *Streptococcus suis* serotype 2 capsular polysaccharide. 2010. *Biochem*  
465 *Cell Biol* 88:513–525. doi: 10.1139/o09-170.
- 466 9. Van Calsteren MR, Gagnon F, Calzas C, Goyette-Desjardins G, Okura M, Takamatsu D,  
467 Gottschalk M, Segura M. 2013. Structure determination of *Streptococcus suis* serotype 14  
468 capsular polysaccharide. *Biochem Cell Biol*. 91:49–58. doi: 10.1139/bcb-2012-0036.
- 469 10. Van Calsteren MR, Goyette-Desjardins G, Gagnon F, Okura M, Takamatsu D, Roy R,  
470 Gottschalk M, Segura M. 2016. Explaining the serological characteristics of *Streptococcus*  
471 *suis* serotypes 1 and 1/2 from their capsular polysaccharide structure and biosynthesis. *J*  
472 *Biol Chem* 291:8387–8398. doi: 10.1074/jbc.M115.700716.



- 473 11. Vinogradov E, Goyette-Desjardins G, Okura M, Takamatsu D, Gottschalk M, Segura M.  
474 2016. Structure determination of *Streptococcus suis* serotype 9 capsular polysaccharide  
475 and assignment of functions of the *cps* locus genes involved in its biosynthesis. Carbohydr  
476 Res. 433:25–30. doi: 10.1016/j.carres.2016.07.005.
- 477 12. Goyette-Desjardins G, Vinogradov E, Okura M, Takamatsu D, Gottschalk M, Segura M.  
478 2018. *Streptococcus suis* serotype 3 and serotype 18 capsular polysaccharides contain di-  
479 *N*-acetyl-bacillosamine. Carbohydr Res 466: 18–29. doi: 10.1016/j.carres.2018.07.003.
- 480 13. Goyette-Desjardins G, Vinogradov E, Okura M, Takamatsu D, Gottschalk M, Segura M.  
481 2019. Structure determination of *Streptococcus suis* serotypes 7 and 8 capsular  
482 polysaccharides and assignment of functions of the *cps* locus genes involved in their  
483 biosynthesis. Carbohydr Res. 473:36–45. doi: 10.1016/j.carres.2018.12.009.
- 484 14. Pan Z, Ma J, Dong W, Song W, Wang K, Lu C, Yao H. 2015. Novel variant serotype of  
485 *Streptococcus suis* isolated from piglets with meningitis. Appl Environ Microbiol. 81:976–  
486 985. doi: 10.1128/AEM.02962-14.
- 487 15. Roy D, Athey TBT, Auger JP, Goyette-Desjardins G, Van Calsteren MR, Takamatsu D,  
488 Okura M, Teatero S, Alcorlo M, Hermoso JA, Segura M, Gottschalk M, Fittipaldi N. 2017.  
489 A single amino acid polymorphism in the glycosyltransferase CpsK defines four  
490 *Streptococcus suis* serotypes. Sci Rep. 7:4066. doi: 10.1038/s41598-017-04403-3.
- 491 16. Zaccaria E, van Baarlen P, de Greeff A, Morrison DA, Smith H, Wells JM. 2014. Control  
492 of competence for DNA transformation in *Streptococcus suis* by genetically transferable  
493 phenotypes. PLoS One. 9:e99394. doi: 10.1371/journal.pone.0099394.
- 494 17. Okura M, Nozawa T, Watanabe T, Murase K, Nakagawa I, Takamatsu D, Osaki M,  
495 Sekizaki T, Gottschalk M, Hamada S, Maruyama F. 2017. A locus encoding variable  
496 defense systems against invading DNA identified in *Streptococcus suis*. Genome Biol  
497 Evol. 9:1000–1012. doi: 10.1093/gbe/evx062.
- 498 18. Segura M, Fittipaldi N, Calzas C, Gottschalk M. 2017. Critical *Streptococcus suis* virulence  
499 factors: Are they all really critical? Trends Microbiol. 25:585–599. doi:  
500 10.1016/j.tim.2017.02.005.
- 501 19. Auger JP, Payen S, Roy D, Dumesnil A, Segura M, Gottschalk M. 2019. Interactions of  
502 *Streptococcus suis* serotype 9 with host cells and role of the capsular polysaccharide:  
503 Comparison with serotypes 2 and 14. PLoS One. 14:e0223864. doi:  
504 10.1371/journal.pone.0223864.

- 505 20. Holden MT, Hauser H, Sanders M, Ngo TH, Cherevach I, Cronin A, Goodhead I, Mungall  
506 K, Quail MA, Price C, Rabinowitsch E, Sharp S, Croucher NJ, Chieu TB, Mai NT, Diep  
507 TS, Chinh NT, Kehoe M, Leigh JA, Ward PN, Dowson CG, Whatmore AM, Chanter N,  
508 Iversen P, Gottschalk M, Slater JD, Smith HE, Spratt BG, Xu J, Ye C, Bentley S, Barrell  
509 BG, Schultsz C, Maskell DJ, Parkhill J. 2009. Rapid evolution of virulence and drug  
510 resistance in the emerging zoonotic pathogen *Streptococcus suis*. PLoS One. 4:e6072. doi:  
511 10.1371/journal.pone.0006072.
- 512 21. Okura M, Lachance C, Osaki M, Sekizaki T, Maruyama F, Nozawa T, Nakagawa I,  
513 Hamada S, Rossignol C, Gottschalk M, Takamatsu D. 2014. Development of a two-step  
514 multiplex PCR assay for typing of capsular polysaccharide synthesis gene clusters of  
515 *Streptococcus suis*. J Clin Microbiol. 52:1714–1719. doi: 10.1128/JCM.03411-13.
- 516 22. Zheng H, Du P, Qiu X, Kerdsin A, Roy D, Bai X, Xu J, Vela AI, Gottschalk M. 2019.  
517 Genomic comparisons of *Streptococcus suis* serotype 9 strains recovered from diseased  
518 pigs in Spain and Canada. Vet Res. 50:62. doi: 10.1186/s13567-019-0680-9.
- 519 23. Gottschalk M, Higgins R, Boudreau M. 1993. Use of polyvalent coagglutination reagents  
520 for serotyping of *Streptococcus suis*. J Clin Microbiol. 31:2192–2194.  
521 doi:10.1128/JCM.31.8.2192-2194.1993.
- 522 24. Bonifait L, Gottschalk M, Grenier D. 2010. Cell surface characteristics of nontypeable  
523 isolates of *Streptococcus suis*. FEMS Microbiol Lett. 311:160–166. doi: 10.1111/j.1574-  
524 6968.2010.02086.x.
- 525 25. Fittipaldi N, Segura M, Grenier D, Gottschalk M. 2012. Virulence factors involved in the  
526 pathogenesis of the infection caused by the swine pathogen and zoonotic agent  
527 *Streptococcus suis*. Future Microbiol. 7:259–279. doi: 10.2217/fmb.11.149.
- 528 26. Auger JP, Dolbec D, Roy D, Segura M, Gottschalk M. 2018. Role of the *Streptococcus*  
529 *suis* serotype 2 capsular polysaccharide in the interactions with dendritic cells is strain-  
530 dependent but remains critical for virulence. PLoS One. 13:e0200453. doi:  
531 10.1371/journal.pone.0200453.
- 532 27. Lecours MP, Gottschalk M, Houde M, Lemire P, Fittipaldi N, Segura M. 2011. Critical  
533 role for *Streptococcus suis* cell wall modifications and suilysin in resistance to  
534 complement-dependent killing by dendritic cells. J Infect Dis. 204:919–929. doi:  
535 10.1093/infdis/jir415.

- 536 28. Auger JP, Fittipaldi N, Benoit-Biancamano MO, Segura M, Gottschalk M. 2016. Virulence  
537 studies of different sequence types and geographical origins of *Streptococcus suis* serotype  
538 2 in a mouse model of infection. *Pathogens*. 5:E48. doi: 10.3390/pathogens5030048.
- 539 29. Segura M, Calzas C, Grenier D, Gottschalk M. 2016. Initial steps of the pathogenesis of  
540 the infection caused by *Streptococcus suis*: fighting against nonspecific defenses. *FEBS*  
541 *Lett*. 590:3772–3799. doi: 10.1002/1873-3468.12364.
- 542 30. Hathaway LJ, Grandgirard D, Valente LG, Täuber MG, Leib SL. 2016. *Streptococcus*  
543 *pneumoniae* capsule determines disease severity in experimental pneumococcal  
544 meningitis. *Open Biol*. 6:150269. doi: 10.1098/rsob.150269.
- 545 31. Prüfer TL, Rohde J, Verspohl J, Rohde M, de Greeff A, Willenborg J, Valentin-Weigand  
546 P. 2019. Molecular typing of *Streptococcus suis* strains isolated from diseased and healthy  
547 pigs between 1996-2016. *PLoS One*. 14:e0210801. doi: 10.1371/journal.pone.0210801.
- 548 32. Hyams C, Yuste J, Bax K, Camberlein E, Weiser JN, Brown JS. 2010. *Streptococcus*  
549 *pneumoniae* resistance to complement-mediated immunity is dependent on the capsular  
550 serotype. *Infect Immun* 78:716–725. doi: 10.1128/IAI.01056-09.
- 551 33. Weinberger DM, Trzeciński K, Lu YJ, Bogaert D, Brandes A, Galagan J, Anderson PW,  
552 Malley R, Lipsitch M. 2009. Pneumococcal capsular polysaccharide structure predicts  
553 serotype prevalence. *PLoS Pathog*. 5:e1000476. doi: 10.1371/journal.ppat.1000476.
- 554 34. Sanchez CJ, Hinojosa CA, Shivshankar P, Hyams C, Camberlein E, Brown JS, Carlos JO.  
555 2011. Changes in capsular serotype alter the surface exposure of pneumococcal adhesins  
556 and impact virulence. *PLoS ONE* 6:e26587. doi: 10.1371/journal.pone.0026587.
- 557 35. Hathaway LJ, Grandgirard D, Valente LG, Täuber MG, Leib SL. 2016. *Streptococcus*  
558 *pneumoniae* capsule determines disease severity in experimental pneumococcal  
559 meningitis. *Open Biol*. 6:150269. doi: 10.1098/rsob.150269.
- 560 36. Hathaway LJ, Brugger SD, Morand B, Bangert M, Rotzetter JU, Hauser C, Graber WA,  
561 Gore S, Kadioglu A, Mühlemann K. 2012. Capsule type of *Streptococcus pneumoniae*  
562 determines growth phenotype. *PLoS Pathog*. 8:e1002574. doi:  
563 10.1371/journal.ppat.1002574.
- 564 37. Auger JP, Benoit-Biancamano MO, Bédard C, Segura M, Gottschalk M. 2019. Differential  
565 role of MyD88 signaling in *Streptococcus suis* serotype 2-induced systemic and central  
566 nervous system diseases. *Int Immunol*. 31:697–714. doi: 10.1093/intimm/dxz033.

- 567 38. Auger JP, Meekhanon N, Okura M, Osaki M, Gottschalk M, Sekizaki T, Takamatsu D.  
568 2016. *Streptococcus suis* serotype 2 capsule *in vivo*. Emerg Infect Dis. 22:1793–1796. doi:  
569 10.3201/eid2210.151640.
- 570 39. Wang Y, Gagnon CA, Savard C, Music N, Srednik M, Segura M, Lachance C,  
571 Bellehumeur C, Gottschalk M. 2013. Capsular sialic acid of *Streptococcus suis* serotype 2  
572 binds to swine influenza virus and enhances bacterial interactions with virus-infected  
573 tracheal epithelial cells. Infect Immun. 81:4498–4508. doi: 10.1128/IAI.00818-13.
- 574 40. Pallarés FJ, Halbur PG, Schmitt CS, Roth JA, Opriessnig T, Thomas PJ, Kinyon JM,  
575 Murphy D, Frank DE, Hoffman LJ. 2003. Comparison of experimental models for  
576 *Streptococcus suis* infection of conventional pigs. Can J Vet Res. 67:225–228.  
577

## 578 **Figure legends**

579 **Fig 1. Effect of serotype switching on *S. suis* CPS expression.** (A) Hydrophobicity of the  
580 different *S. suis* strains/mutants. Very low surface hydrophobicity is indicative of high  
581 encapsulation, which is demonstrated in the previous study [24]. Data are expressed as mean  $\pm$   
582 standard error of the mean (SEM) (n = 3). An asterisk denotes a significant difference with SS2  
583 by Mann-Whitney rank sum test ( $p < 0.05$ ). (B) Transmission electron micrographs showing  
584 CPS expression of the different *S. suis* strains/mutants. Scale bars = 0.5  $\mu$ m.

585

586 **Fig 2. Mutations present in the generated *S. suis* serotype-switched mutants.** Each of the  
587 schematic representations illustrates the analysis data using Geneious Prime mapping of the  
588 draft genome sequence of each mutant (upper part) on the publicly available completed genome  
589 sequence of serotype 2 (accession no. AM946016) and the sequence alignment between two  
590 genomes (lower part). All gaps between the contigs of each mutant were due to multi-copy  
591 genes, such as rRNA genes, tRNA genes and IS elements, or repeated regions within genes.  
592 Gaps of the repeated regions within genes were found in the genes corresponding to the SS2  
593 locus tags SSU0496, SSU1127, SSU1171, and SSU1172. Detailed data on mutated genes can  
594 be found in **Table S2**. Below the bottom panel are displayed the descriptions for each color of  
595 the different drawings.

596

597 **Fig 3. Impact of serotype switching on *S. suis* adhesion to and invasion of porcine tracheal**  
598 **epithelial cells, resistance to phagocytosis by macrophages, whole blood bacterial killing,**  
599 **and pro-inflammatory mediator production by dendritic cells.** Adhesion (A) and invasion  
600 (B) of the different *S. suis* strains and mutants to NPTr porcine tracheal epithelial cells after 2  
601 h of incubation. (C) Internalization of the different *S. suis* strains and mutants by J774A.1  
602 murine macrophages after 2 h of incubation. (D) Killing of the different *S. suis* strains and  
603 mutants by murine whole blood after 4 h of incubation. (E) Growth capacity of the different *S.*  
604 *suis* strains and mutants in porcine whole blood after 4 h of incubation. (F) Pro-inflammatory  
605 mediator production by DCs at 16 h following infection with the different *S. suis* strains and  
606 mutants as measured by ELISA. Production of tumor necrosis factor (TNF), interleukin (IL)-6,  
607 IL-12p70, C-C motif chemokine ligand (CCL) 5, and C-X-C motif chemokine ligand (CXCL)  
608 1, and CXCL9. C- denotes cells in medium alone. All the data represent the mean  $\pm$  SEM (n =  
609 4). An asterisk denotes a significant difference with SS2 by Mann-Whitney rank sum test (E)  
610 ( $p < 0.05$ ).

611  
612  
613  
614  
615  
616  
617  
618  
619  
620  
621  
622

**Fig 4. Impact of serotype switching on *S. suis* virulence and plasma pro-inflammatory mediator production in a mouse model of infection.** (A) Survival of C57BL/6 mice following intraperitoneal inoculation of  $1 \times 10^7$  CFU of the different *S. suis* strains and mutants. (B) Blood bacterial burden 24 h post-infection of C57BL/6 mice. A blood bacterial burden of  $2 \times 10^9$  CFU/mL, corresponding to average burden upon euthanasia, was attributed to euthanized mice. (C) Plasma levels of IL-6, IL-12p70, IFN- $\gamma$ , CCL2, CCL3, CCL4, CCL5, and CXCL2 in C57BL/6 mice at 12 h following intraperitoneal inoculation of  $1 \times 10^7$  CFU of the different *S. suis* strains and mutants. Data represent survival curves (A) (n = 10-12), geometric mean (B) (n = 10-12) or mean  $\pm$  SEM (C) (n = 8). An asterisk denotes a significant difference with SS2 by Log-rank (Mantel-Cox) test (A) and Mann-Whitney rank sum test (B-C) ( $p < 0.05$ ).

623 **Tables**

624 **Table 1. *S. suis* strains used in this study**

| Strain     | Sero-type <sup>a</sup> | MLST <sup>b</sup> | Description                                                                                                                                                  | Reference  |
|------------|------------------------|-------------------|--------------------------------------------------------------------------------------------------------------------------------------------------------------|------------|
| P1/7 (SS2) | 2                      | ST1 (CC1)         | Serotype 2 reference strain isolated from a pig with meningitis; genome completely sequenced                                                                 | [20]       |
| ΔCPS2tocat | UT                     | ST1 (CC1)         | Non-encapsulated P1/7 mutant, in which <i>cps2</i> genes ( <i>cps2A-cps2S</i> ) were replaced with the <i>cat</i> cassette; chloramphenicol resistant        | This study |
| SS2to3     | 3                      | ST1 (CC1)         | Serotype-switched P1/7 mutant, in which <i>cps2</i> genes ( <i>cps2A-cps2S</i> ) were replaced with <i>cps3</i> genes ( <i>cps3A-cps3N</i> ); serotype 3     | This study |
| SS2to4     | 4                      | ST1 (CC1)         | Serotype-switched P1/7 mutant, in which <i>cps2</i> genes ( <i>cps2A-cps2S</i> ) were replaced with <i>cps4</i> genes ( <i>cps4A-cps4Q</i> ); serotype 4     | This study |
| SS2to7     | 7                      | ST1 (CC1)         | Serotype-switched P1/7 mutant, in which <i>cps2</i> genes ( <i>cps2A-cps2S</i> ) were replaced with <i>cps7</i> genes ( <i>cps7A-cps7R</i> ); serotype 7     | This study |
| SS2to8     | 8                      | ST1 (CC1)         | Serotype-switched P1/7 mutant, in which <i>cps2</i> genes ( <i>cps2A-cps2S</i> ) were replaced with <i>cps8</i> genes ( <i>cps8A-cps8P</i> ); serotype 8     | This study |
| SS2to9     | 9                      | ST1 (CC1)         | Serotype-switched P1/7 mutant, in which <i>cps2</i> genes ( <i>cps2A-cps2S</i> ) were replaced with <i>cps9</i> genes ( <i>cps9A-cps9N</i> ); serotype 9     | This study |
| SS2to14    | 14                     | ST1 (CC1)         | Serotype-switched P1/7 mutant, in which <i>cps2</i> genes ( <i>cps2A-cps2S</i> ) were replaced with <i>cps14</i> genes ( <i>cps14A-cps14V</i> ); serotype 14 | This study |
| ΔCPS2      | UT                     | ST1 (CC1)         | Non-encapsulated P1/7 mutant, in which <i>cps2</i> genes ( <i>cps2A-cps2S</i> ) were deleted                                                                 | This study |
| MO691      | 3                      | ST108 (CC94)      | Field isolate from a lung of a diseased pig; donor of serotype 3 genome DNA                                                                                  | [21]       |
| 6407       | 4                      | ST54 (CC53/54)    | Serotype 4 reference strain from a diseased pig; donor of serotype 4 genome DNA                                                                              |            |
| MO690      | 7                      | ST29 (CC25)       | Field isolate from the brain of a pig with meningitis; donor of serotype 7 genome DNA                                                                        | [21]       |
| MO941      | 8                      | ST87 (CC87)       | Field isolate from a lung of a diseased pig; donor of serotype 8 genome DNA                                                                                  | [21]       |
| 1016/10    | 9                      | ST16 (CC16)       | Field isolate from the brain of a diseased pig with meningitis; donor of serotype 9 genome DNA                                                               | [22]       |
| DAN13730   | 14                     | ST6 (CC1)         | Serotype 14 reference strain from a human; donor of serotype 14 genome DNA                                                                                   |            |
| MNCM50     | 2                      | ST104 (CC104)     | Clinical isolate from a patient with pulmonary edema, the source of the <i>afuC</i> gene                                                                     | [17]       |

625 <sup>a</sup> UT, untypeable.

626 <sup>b</sup> ST, sequence type; CC, clonal complex.

627 **Table 2. *S. suis* swine infection outcomes and clinical diseases**

| Exp. no.- Group no. | Strain  | Infectio n dose (CFU) | Mortality <sup>a</sup> | Morbidity <sup>b</sup> | Body temp >40.5°C | Description of clinical signs                                                                           |
|---------------------|---------|-----------------------|------------------------|------------------------|-------------------|---------------------------------------------------------------------------------------------------------|
| I-1                 | SS2     | 2.0 × 10 <sup>9</sup> | 1/4                    | 4/4                    | 4/4               | Lameness (3/4)<br>Symptoms improved in one of the pigs<br>Shivering with vomition (1/4)                 |
| I-2                 | ΔCPS2   | 2.9 × 10 <sup>9</sup> | 0/4                    | 0/4                    | 0/4               |                                                                                                         |
| I-3                 | SS2to4  | 2.8 × 10 <sup>9</sup> | 0/4                    | 0/4                    | 0/4               |                                                                                                         |
| I-4                 | SS2to7  | 3.1 × 10 <sup>9</sup> | 1/4                    | 1/4                    | 1/4               | Shivering and clearly uncoordinated                                                                     |
| II-1                | SS2     | 1.4 × 10 <sup>9</sup> | 0/4                    | 0/4                    | 2/4               | Slight fever at 4 dpi (2/4).<br>Slight inactivity at 5 dpi (4/4).<br>All animals subsequently recovered |
| II-2                | SS2to3  | 2.8 × 10 <sup>9</sup> | 0/4                    | 0/4                    | 0/4               |                                                                                                         |
| II-4                | SS2to8  | 1.2 × 10 <sup>9</sup> | 1/4                    | 1/4                    | 2/4               | Inactive and lame                                                                                       |
| II-5                | SS2to14 | 1.2 × 10 <sup>9</sup> | 0/5                    | 0/5                    | 0/5               |                                                                                                         |

628 <sup>a</sup> Number of pigs to reach predefined clinical end point (see **Text S8** for more detail).

629 <sup>b</sup> Number of pigs having a score of >1 on attitude or locomotion.

630 Abbreviations: Exp., Experiment; dpi, days post-infection.



631 **Table 3. Recovery of inoculated strains from infected piglets**

| Exp. no.- Group no. | Strain  | Morbidity | No. of pigs in which inoculum was recovered/total no. of pigs |                   |        |        |       |                    |                    |     |       |                              |
|---------------------|---------|-----------|---------------------------------------------------------------|-------------------|--------|--------|-------|--------------------|--------------------|-----|-------|------------------------------|
|                     |         |           | Tonsil                                                        | Lung <sup>a</sup> | Kidney | Spleen | Liver | Brain <sup>b</sup> | Joint <sup>c</sup> | EC  | Blood | Multiple organs <sup>d</sup> |
| I-1                 | SS2     | 4/4       | 4/4                                                           | 1/4               | 1/4    | 4/4    | 2/4   | 2/4                | 3/4                | 1/4 | 4/4   | 4/4                          |
| I-2                 | ΔCPS2   | 0/4       | 2/4                                                           | 0/4               | 0/4    | 0/4    | 1/4   | 0/4                | 0/4                | 0/4 | 0/4   | 0/4                          |
| I-3                 | SS2to4  | 0/4       | 4/4                                                           | 0/4               | 0/4    | 0/4    | 1/4   | 0/4                | 0/4                | 0/4 | 0/4   | 0/4                          |
| I-4                 | SS2to7  | 1/4       | 4/4                                                           | 0/4               | 0/4    | 0/4    | 0/4   | 1/4                | 0/4                | 0/4 | 0/4   | 0/4                          |
| II-1                | SS2     | 0/4       | 4/4                                                           | 0/4               | 0/4    | 0/4    | 0/4   | 0/4                | 2/4                | 0/4 | 0/4   | 0/4                          |
| II-2                | SS2to3  | 0/4       | 4/4                                                           | 0/4               | 1/4    | 0/4    | 2/4   | 0/4                | 0/4                | 0/4 | 0/4   | 1/4                          |
| II-3                | SS2to8  | 1/4       | 4/4                                                           | 1/4               | 2/4    | 3/4    | 3/4   | 1/4                | 1/4                | 4/4 | 1/4   | 4/4                          |
| II-4                | SS2to14 | 0/5       | 5/5                                                           | 1/5               | 1/5    | 2/5    | 2/5   | 1/5                | 1/5                | 1/5 | 1/5   | 2/5                          |

632 <sup>a</sup> Part of one cranial lobe was investigated.

633 <sup>b</sup> Part of cerebrum was investigated.

634 <sup>c</sup> Swab from a joint of the hind legs. In cases of lameness, a joint puncture of the  
635 corresponding limb was screened.

636 <sup>d</sup> Recovery from two or more sites, except for tonsils.

637 Abbreviations: Exp., Experiment; EC, endocardium.

638

639 **Table 4. Summary of the effects caused by serotype switching from serotype 2 on *in vivo***  
 640 **and *in vitro* virulence analyzed in this study**

| Strain  | Serotype    | <i>In vitro</i>    |          |                    |                                      |                       |               | <i>In vivo</i> |                                      |           |                     |           |                     |    |
|---------|-------------|--------------------|----------|--------------------|--------------------------------------|-----------------------|---------------|----------------|--------------------------------------|-----------|---------------------|-----------|---------------------|----|
|         |             | Porcine NPTr cells |          | Murine macrophages | Murine DCs                           | Murine blood          | Porcine blood | Mice           | Pig (Exp. I)                         |           | Pig (Exp. II)       |           |                     |    |
|         |             | Adhesion           | Invasion | Anti-phagocytosis  | Pro-inflammatory mediator production | Resistance to killing | Mortality     | Blood burden   | Pro-inflammatory mediator production | Morbidity | Organ dissemination | Morbidity | Organ dissemination |    |
| SS2to3  | 3           | -                  | -        | -                  | -                                    | ↓                     | ↓             | -              | ↓                                    | ↓         | NT                  | NT        | -                   | ↑  |
| SS2to4  | 4           | -                  | -        | -(↓) <sup>a</sup>  | ↓                                    | ↓                     | ↓             | ↓              | ↓                                    | ↓         | ↓                   | ↓         | NT                  | NT |
| SS2to7  | 7           | ↑                  | -        | -(↓) <sup>a</sup>  | -                                    | -                     | ↓             | -              | -                                    | -         | ↓                   | ↓         | NT                  | NT |
| SS2to8  | 8           | ↑                  | -        | -(↓) <sup>a</sup>  | ↑                                    | -                     | -             | ↑              | ↑                                    | ↑         | NT                  | NT        | ↑                   | ↑  |
| SS2to9  | 9 (variant) | -                  | -        | -                  | -                                    | -                     | ↓             | -              | -                                    | -         | NT                  | NT        | NT                  | NT |
| SS2to14 | 14          | -                  | -        | -                  | -                                    | -                     | ↓             | -              | -                                    | -         | NT                  | NT        | -                   | ↑  |
| ΔCPS2   | Non-typable | ↑                  | ↑        | ↓                  | ↑                                    | ↓                     | ↓             | ↓              | ↓                                    | ↓         | ↓                   | ↓         | NT                  | NT |

641 <sup>a</sup> After 2h incubation, significantly more bacteria were internalized.

642 Abbreviations: NPTr, newborn pig trachea; DC, dendritic cell; -, no significant difference  
 643 compared to SS2; ↑, significantly higher than SS2; ↓, significantly lower than SS2; NT,  
 644 not tested.

645

646

## 647 **Supporting information**

648 **Fig S1. Reported composition and structure of the *S. suis* serotype 2, 3, 7, 8, 9, and 14**  
649 **CPSs.** Monosaccharide symbols follow the Symbol Nomenclature for Glycans System (Varki  
650 A, Cummings RD, Aebi M, Packer NH, Seeberger PH, Esko JD, et al. Symbol nomenclature  
651 for graphical representations of glycans *Glycobiology*. 2015;25: 1323-1324). Abbreviations:  
652 D-6d-xy/HexNAc, 2-acetamido-2,6-dideoxy-D-xylo-hexose; 4NAc, 4-acetamido; 4N, 4-amino.

653 **Fig S2. Diagram of the procedure used for construction of the *S. suis* serotype-switched**  
654 **mutants.** The procedure consists of five steps. Construction of the non-encapsulated mutant  
655 (step 1) is the most important step of the procedure, as it is essential for the following screening  
656 and selection steps. Due to a lower buoyancy density of encapsulated bacterial cells than those  
657 of the non-encapsulated cells, a density gradient centrifugation with Percoll (step 3) was used  
658 to screen encapsulated (i.e., serotype-switched) transformants from  $\Delta$ CPS2toCAT transformed  
659 with genome DNA of a donor strain in step 2. Moreover, encapsulated transformants were  
660 further selected by the differences in how the precipitations were formed in a static liquid  
661 medium (step 4) due to the elevated hydrophobicity of non-encapsulated cells. Abbreviation:  
662 CP, chloramphenicol; XIP, *sigX*-inducing peptide; TH, Todd-Hewitt.

663  
664 **Fig S3. Diagram of the procedure used for construction of the markerless *S. suis* non-**  
665 **encapsulated mutant.** Abbreviations: CP, chloramphenicol; XIP, *sigX*-inducing peptide; TH,  
666 Todd-Hewitt.

667  
668 **Fig S4. Growth curves of the different *S. suis* serotype-switched mutants.** Growth curves  
669 of P1/7, non-encapsulated mutant ( $\Delta$ CPS2) and serotype-switched mutants (SS2to3, SS2to4,  
670 SS2to7, SS2to8, SS2to9, and SS2to14) derived from P1/7 are shown.

671  
672 **Fig S5. 500 MHz  $^1$ H NMR spectra of the *S. suis* serotype-switched mutant CPSs.** (A)  
673 SS2to3, resonance reporter signals (85°C):  $\delta$  4.56 and 4.33 (anomeric), 2.01 and 1.94 (acetyl  
674 methyl), and 1.22 (6-deoxy sugar methyl); (B) SS2to7, resonance reporter signals (25°C):  $\delta$   
675 5.68, 5.43, 5.07, and 4.58 (anomeric), 2.02 (acetyl methyl), as well as 1.33 and 1.24 (6-deoxy  
676 sugar methyl); (C) SS2to8, resonance reporter signals (25°C):  $\delta$  5.49, 5.01, and 4.91  
677 (anomeric), 2.08 (acetyl methyl), and 1.30 (6-deoxy sugar methyl); (D) SS2to9, resonance  
678 reporter signals (50°C):  $\delta$  5.44, 5.40, 5.00, 4.99, 4.96, 4.80, 4.76, and 4.72 (anomeric), 2.04  
679 (acetyl methyl), as well as 1.27, 1.27, and 1.24 (6-deoxy sugar methyl); (E) SS2to14, resonance

680 reporter signals (77°C):  $\delta$  4.77, 4.62, 4.50, 4.50, and 4.45 (anomeric), 2.05 and 2.03 (acetyl  
681 methyl), 2.68 (Neu5Ac H-3e), and 1.68 (Neu5Ac H-3a). Except for SS2to9 CPS, the slight  
682 differences in chemical shifts compared to published values [references 9, 12, and 13 in the  
683 text] can be attributed to different sample concentration and pH, internal reference, and spectral  
684 acquisition temperature. Two-dimensional (2D) correlation spectroscopy (COSY) experiments,  
685 and additionally for SS2to9 CPS the 2D heteronuclear single-quantum coherence (HSQC)  
686 experiment, were also performed, and the observed cross-peaks were in complete support of  
687 the structures. Abbreviation: Sug, 6dxy/HexNAc-4-ulo.

688

689 **Fig S6. Difference in CPS between SS2to9 and strain 1273590.** (A) Composition and  
690 structure of CPSs. (B) Nucleotide sequence alignment between the *cps* loci. Each schematic  
691 representation shows the analysis data using Geneious Prime. Below the bottom panel are  
692 displayed the descriptions for each color of the different drawings. Nucleotide sequence of *cps*  
693 locus of 1273590 was extracted from its draft genome sequence (Accession no. SRS1751390).  
694 Glycosyl transferase genes, *cps9F*, *cps9G*, *cps9H*, *cps9I*, and *cps9K* were appended.

695

696 **Fig S7. Replacement between *cps* loci.** (A) SS2to3, (B) SS2to4, (C) SS2to7, (D) SS2to8, (E)  
697 SS2to9, and (F) SS2to14. Each schematic representation shows the analysis data using  
698 Geneious Prime on the sequence alignment between the *cps* loci and their flanking regions of  
699 the serotype-switched mutants and donor strains (upper part) and between the *cps* loci of the  
700 serotype-switched mutants and reference serotype strains (lower part). Below the bottom panel  
701 are displayed the descriptions for each color of the different drawings.

702

703 **Fig S8. Blood bacterial burdens at 48 h and 72 h post-infection of mice inoculated with**  
704 **the different *S. suis* strains and mutants.** Data represent the geometric mean (n = 10-12). A  
705 blood bacterial burden of  $2 \times 10^9$  CFU/mL, corresponding to average burden upon euthanasia,  
706 was attributed to euthanized mice. n.d. denotes not determined. An asterisk denotes a significant  
707 difference with SS2 by Mann-Whitney rank sum test ( $p < 0.05$ ).

708

709 **Table S1. Purification yields of the CPS from the different *S. suis* strains and serotype-**  
710 **switched mutants**

711

712 **Table S2. Mutated genes present in the serotype-switched mutants and their amino acid**  
713 **identities with those corresponding of strain P1/7**

714

715 **Table S3. Daily score of individual piglets**

716

717 **Table S4. Reisolation of the infection strain from each piglet**

718

719 **Table S5. Primers used in this study**

720

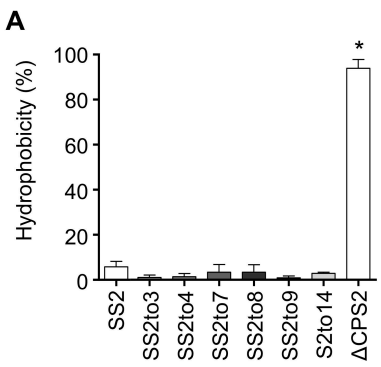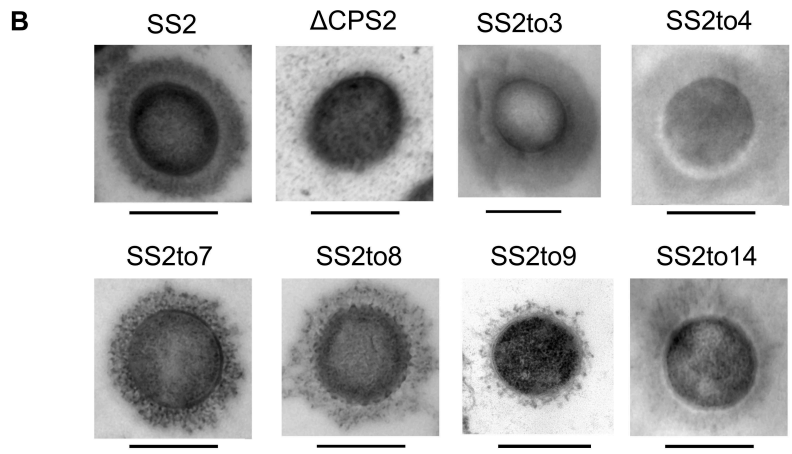

Fig1

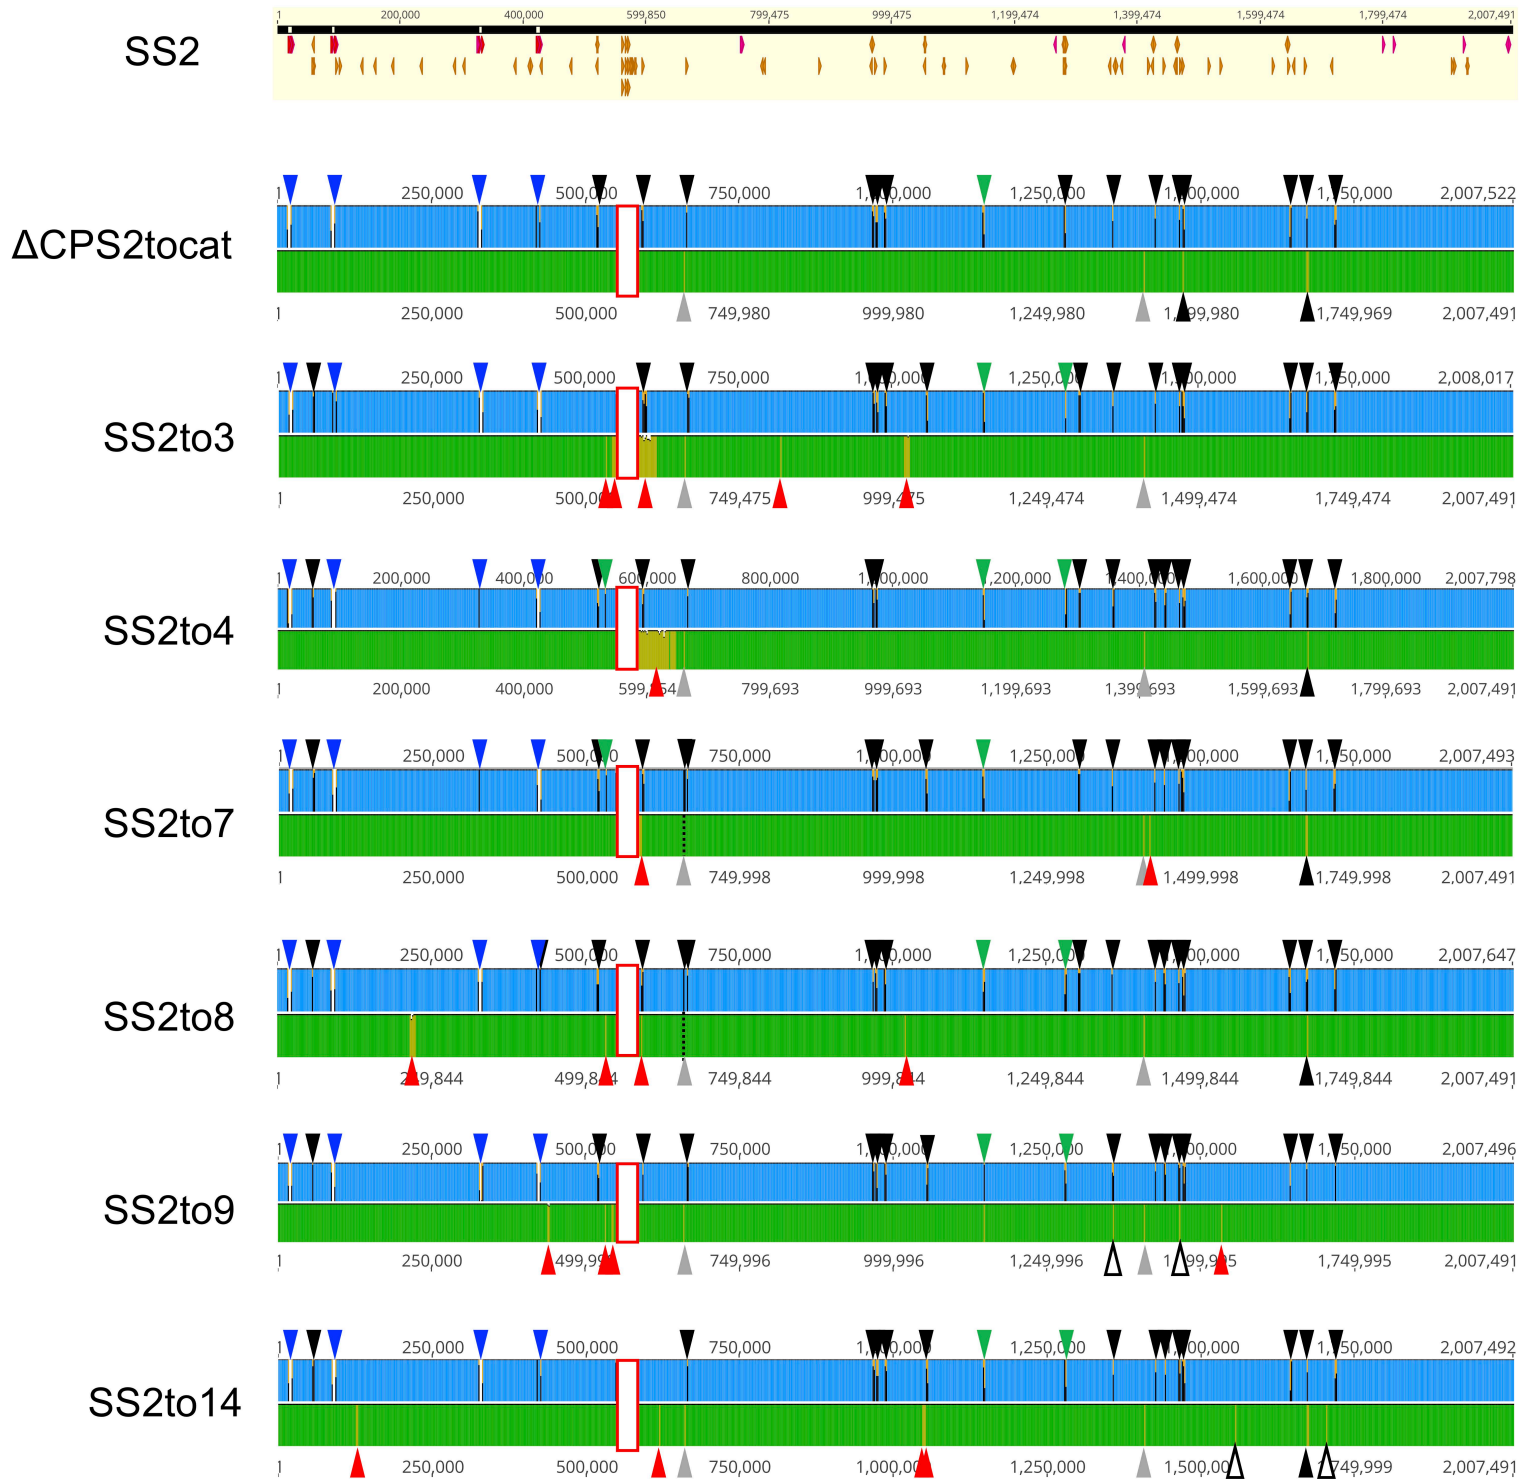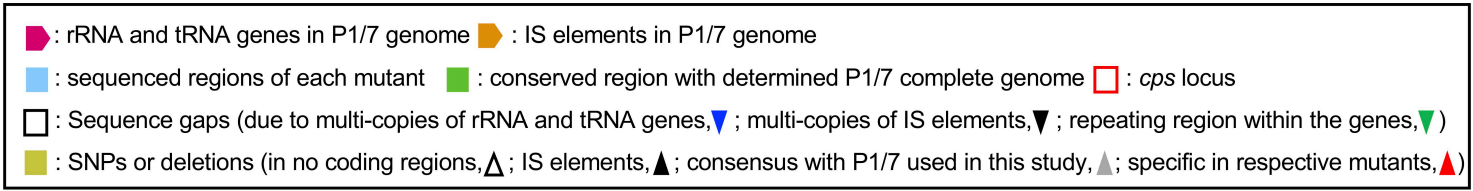

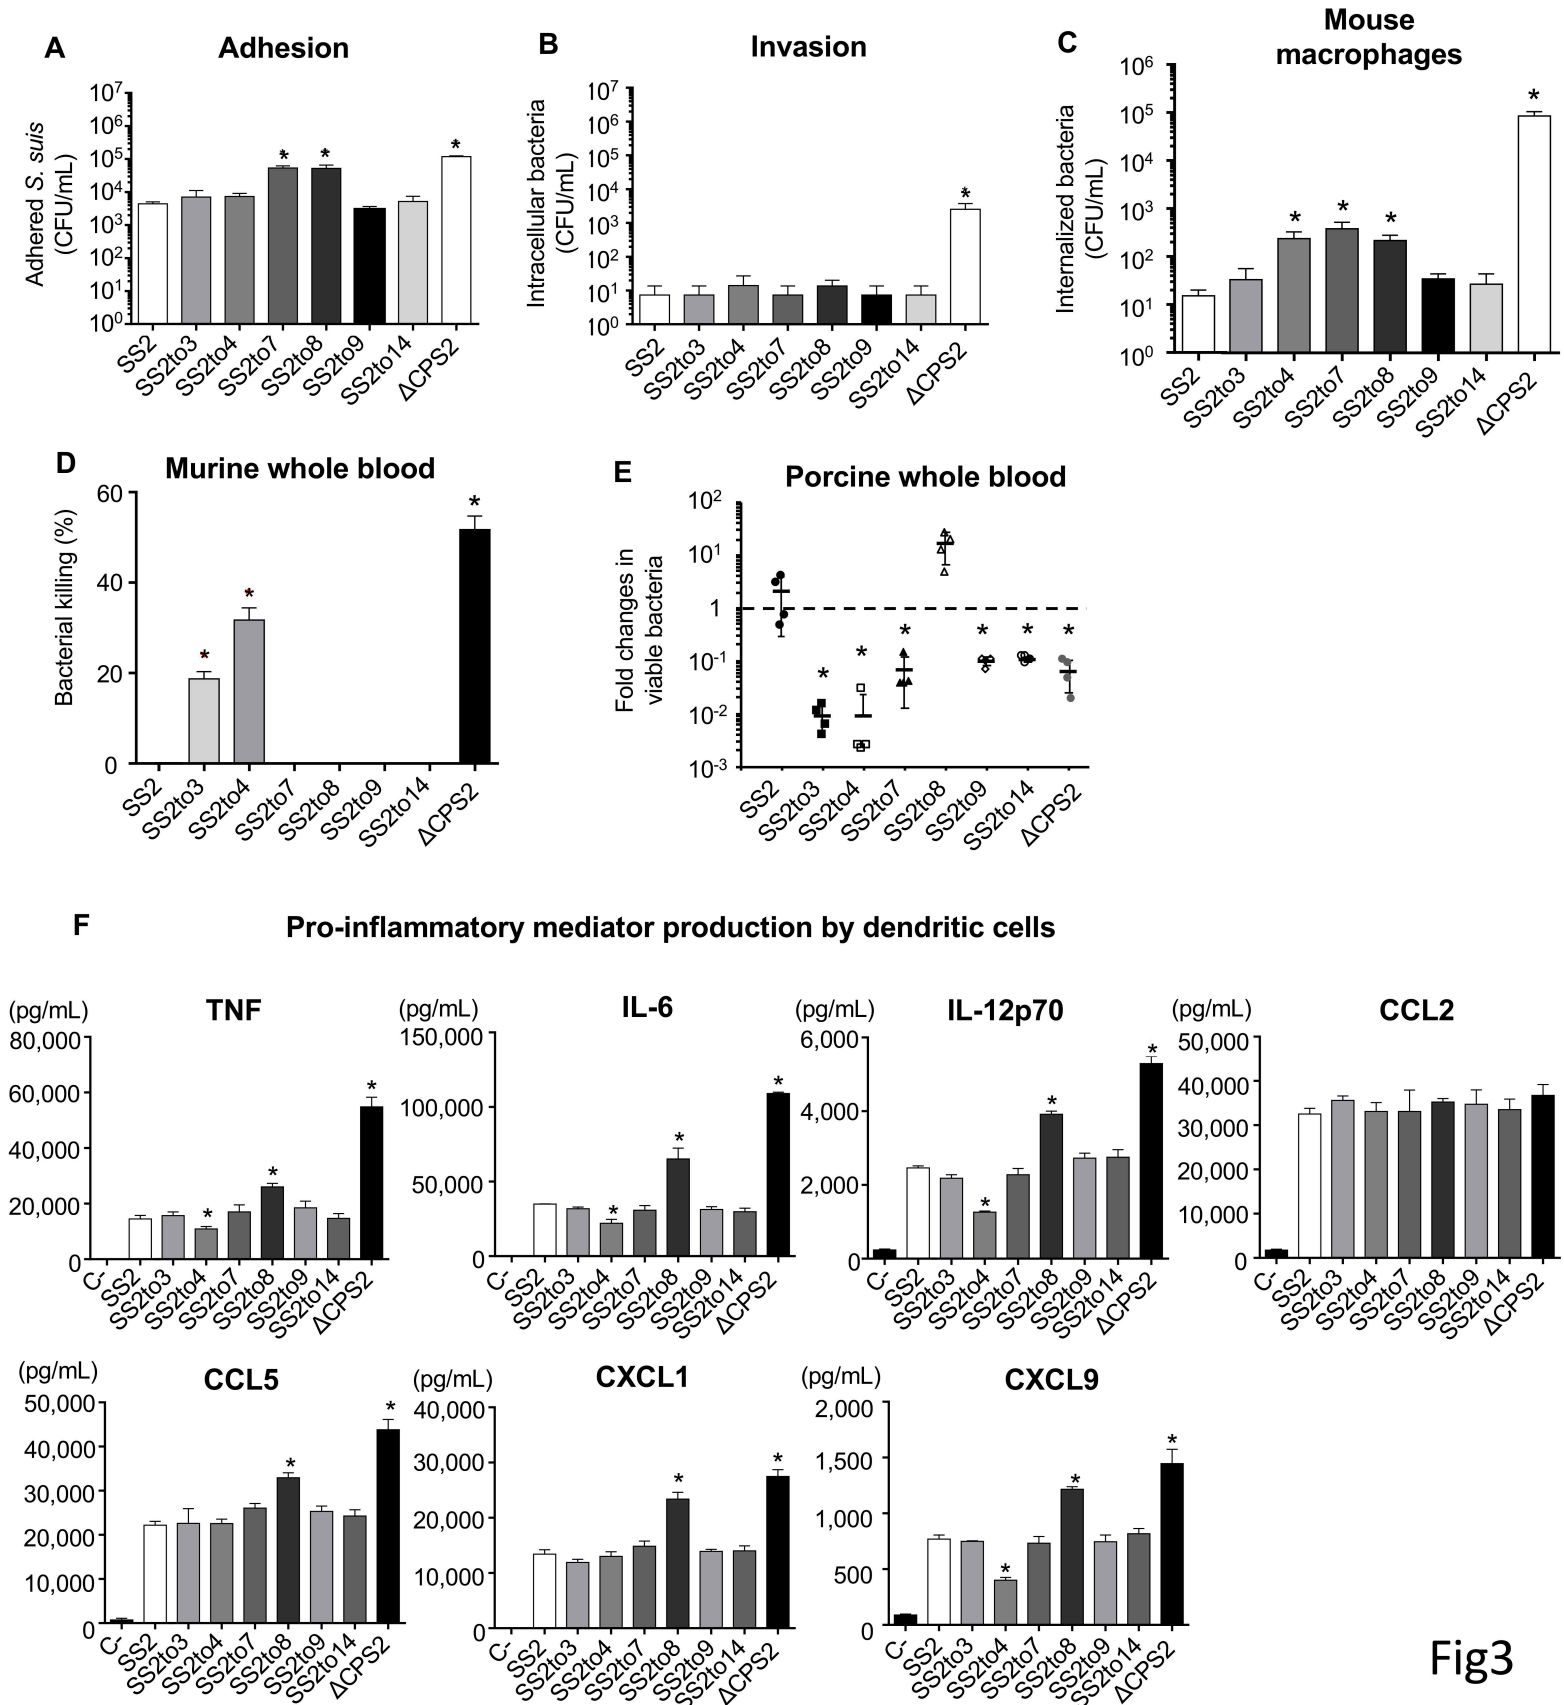

Fig3



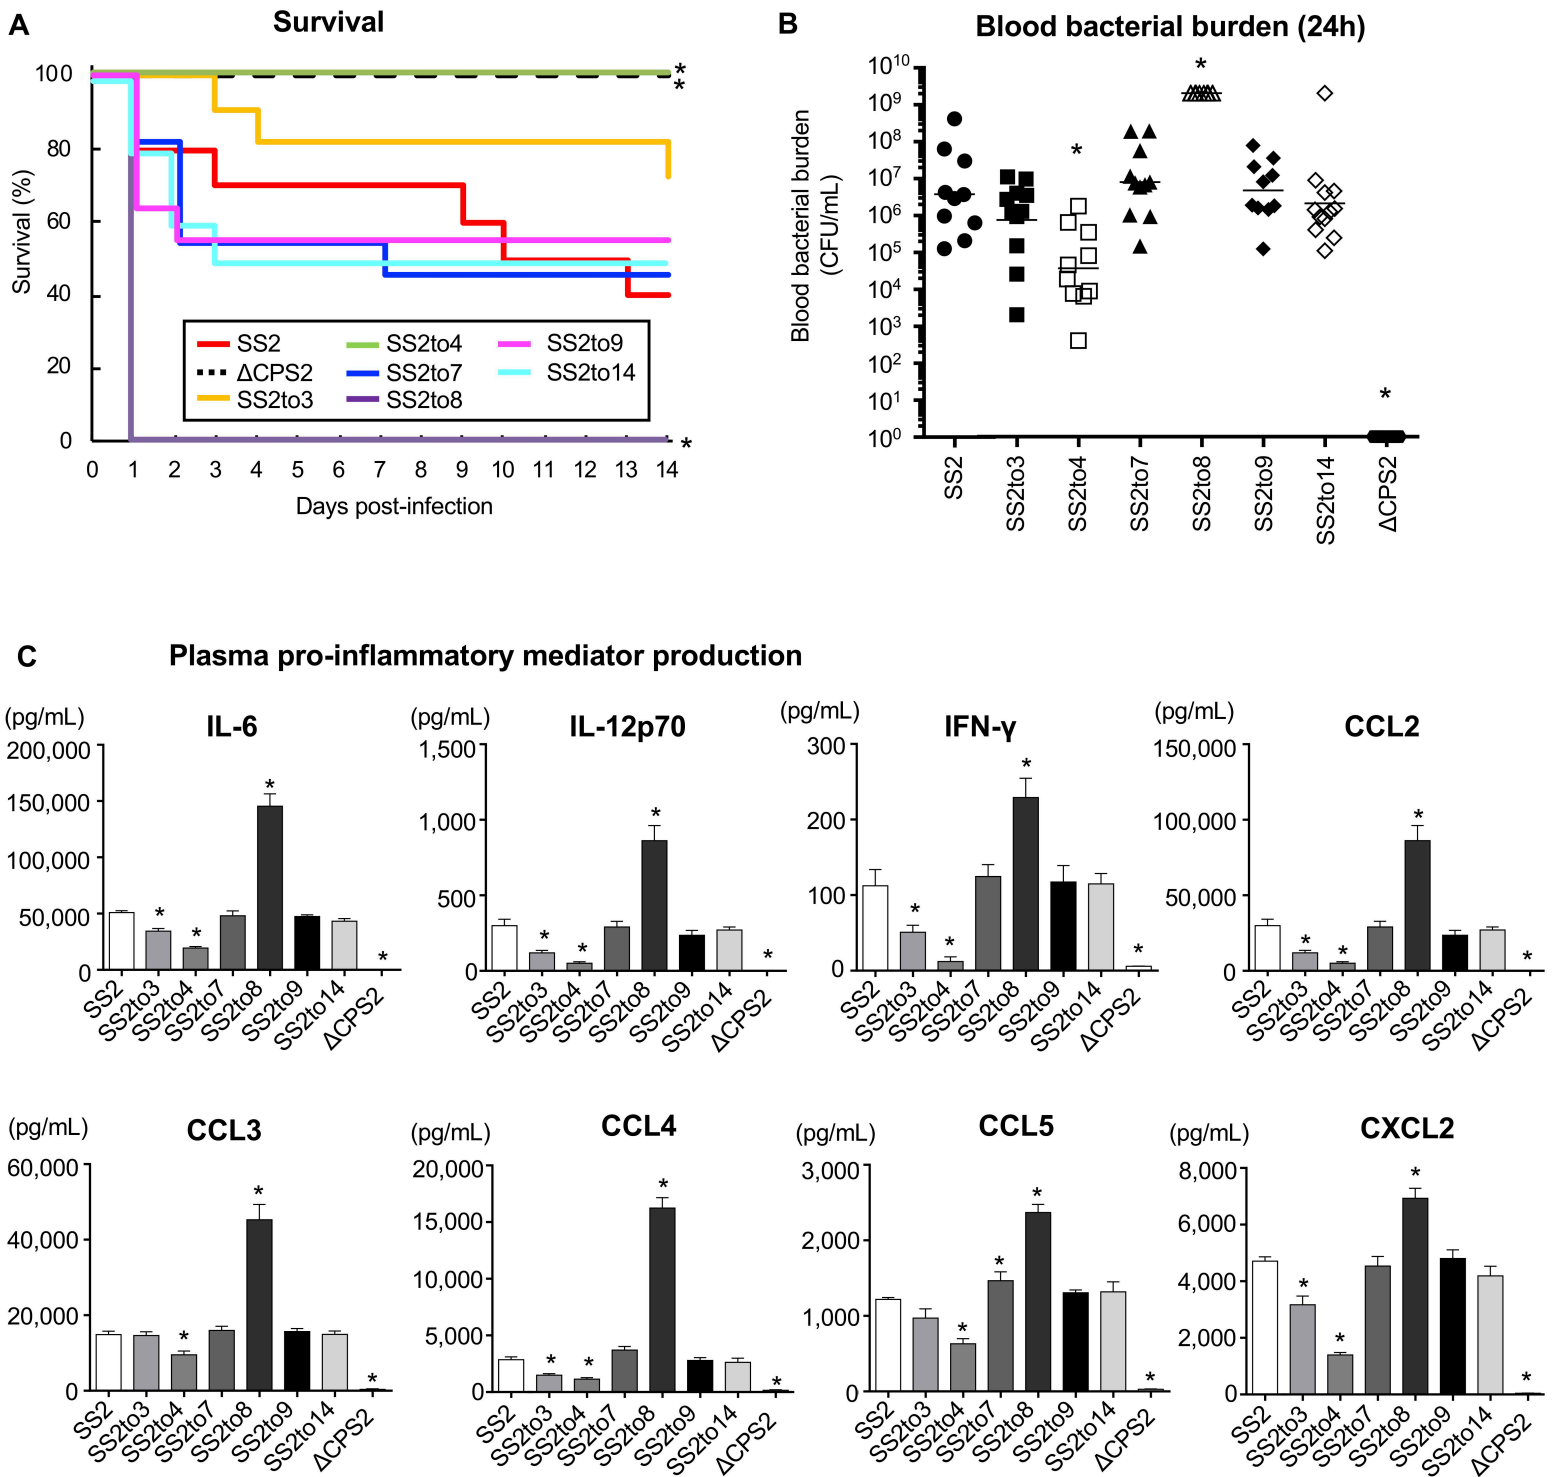

Fig4
